# Supplementary material
Source: HighWire-hosted journal article supplement (https://jnm.snmjournals.org/highwire/filestream/94497/field_highwire_adjunct_files/0/117697_Supplemental_Data.pdf)
Supplement: 117697_Supplemental_Data.pdf [file 117697_Supplemental_Data.pdf]

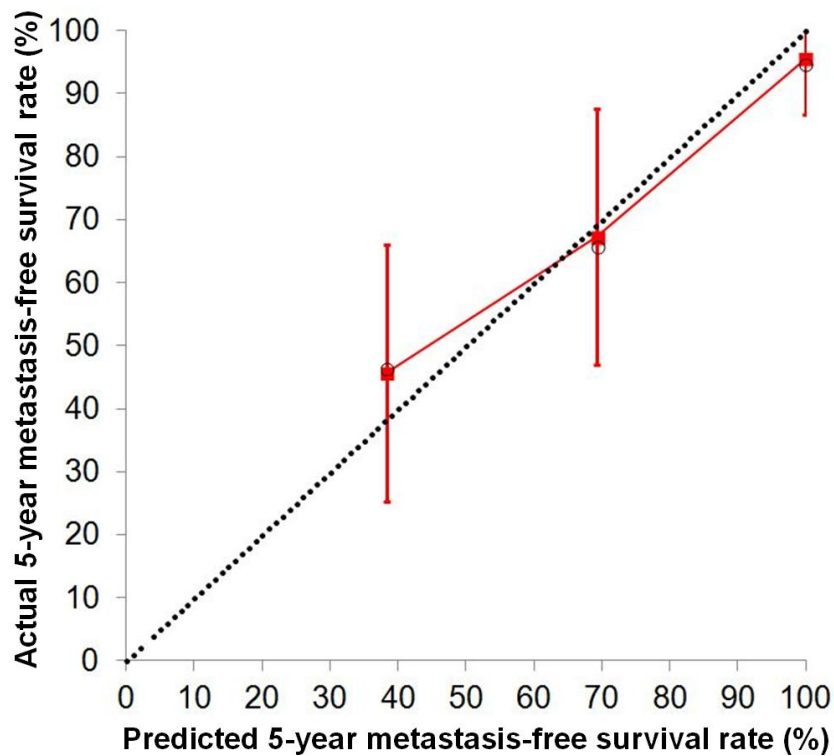

**SUPPLEMENTAL FIGURE 1.** Calibration curves for 5-year metastasis-free survival predictions. Dashed line, an ideal prediction by the model; solid line, performance of the present prediction model; filled squares, subcohort of present database; hollow dots, bootstrap-corrected predictions of the present model's performance with 200 resamples; vertical bar, 95% confidence interval.
